# Supplementary material for: A stable N-doped NiMoO4/NiO2 electrocatalyst for efficient oxygen evolution reaction
Source: Royal Society of Chemistry journal article supplement (doi:10.1039/d3dt04034h), 2024-01-01
Supplement: d3dt04034h1.pdf [file d3dt04034h1.pdf]

## Supporting Information

### Stable N-doped NiMoO<sub>4</sub>/NiO<sub>2</sub> electrocatalyst for efficient oxygen evolution reaction

Zhengfang Hou, Fangyuan Fan, Zhe Wang, and Yeshuang Du\*

Hubei Key Laboratory of Pollutant Analysis and Reuse Technology, College of Chemistry and Chemical Engineering, Hubei Normal University, Huangshi 435002, China.

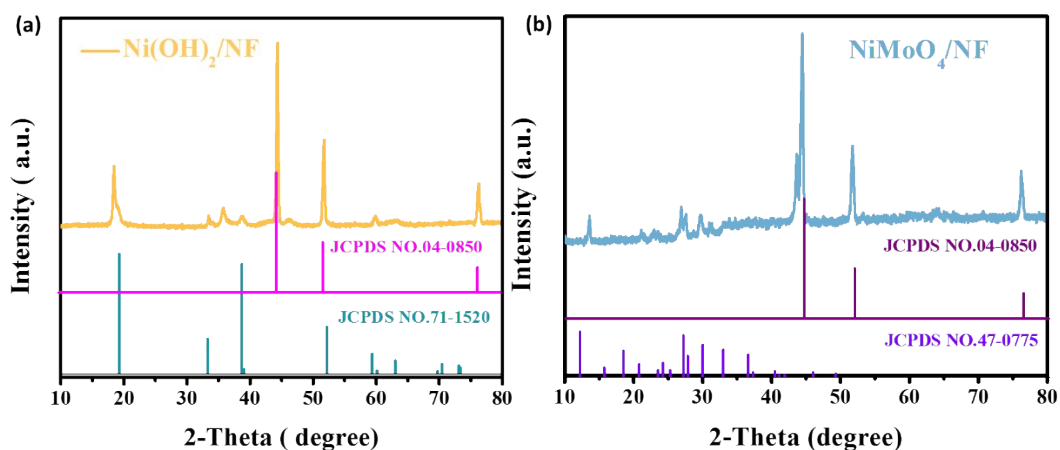

Figure S1 XRD patterns of Ni(OH)<sub>2</sub>/NF and NiMoO<sub>4</sub>/NF electrocatalysts.

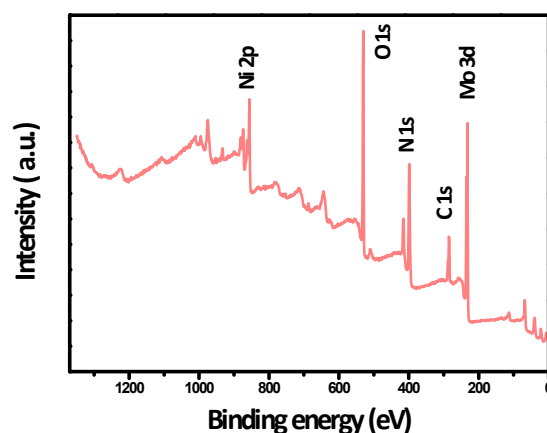

Figure S2 The XPS survey spectrum of N-NiMoO<sub>4</sub>/NiO<sub>2</sub> electrocatalyst.

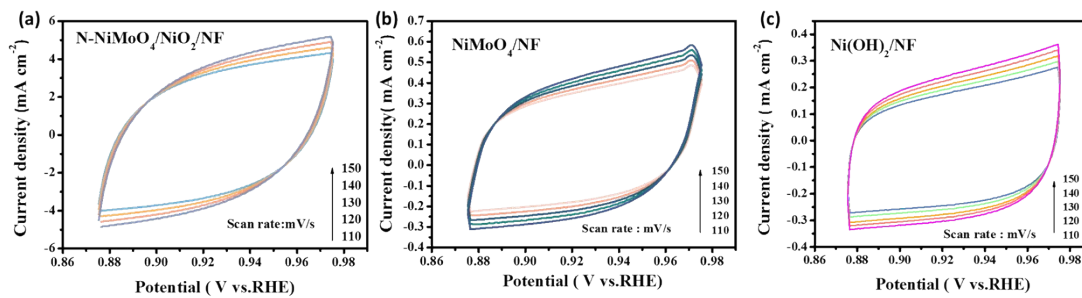

Figure S3 Cyclic voltammetry curves of N-NiMoO<sub>4</sub>/NiO<sub>2</sub>, NiMoO<sub>4</sub>/NF, Ni(OH)<sub>2</sub>/NF electrocatalysts at the scan rates of 110, 120, 130, 140 and 150 mV s<sup>-1</sup>.

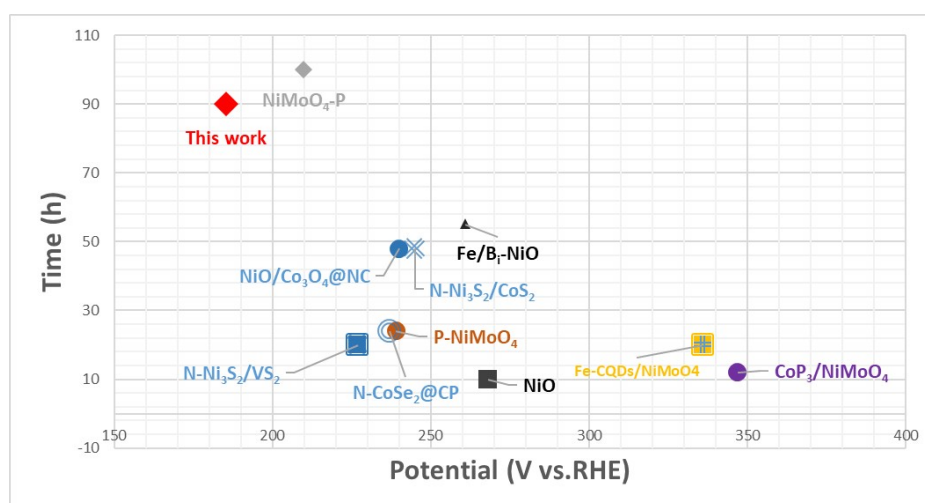

Figure S4 Electrochemical performance and chemical stability of different catalysts

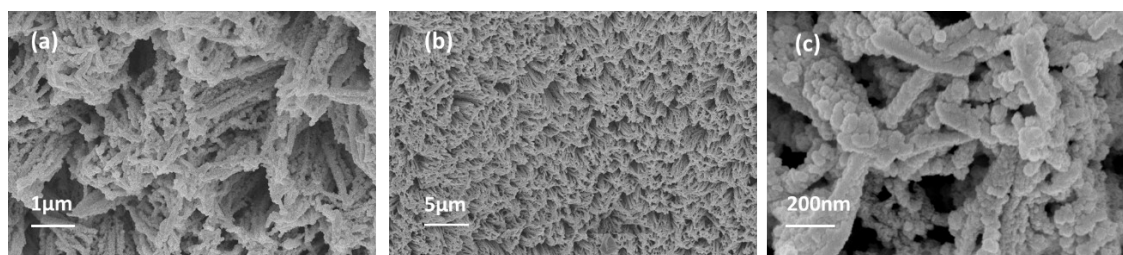

Figure S5 SEM images at different magnification of N-NiMoO<sub>4</sub>/NiO<sub>2</sub> electrocatalyst after stability test.

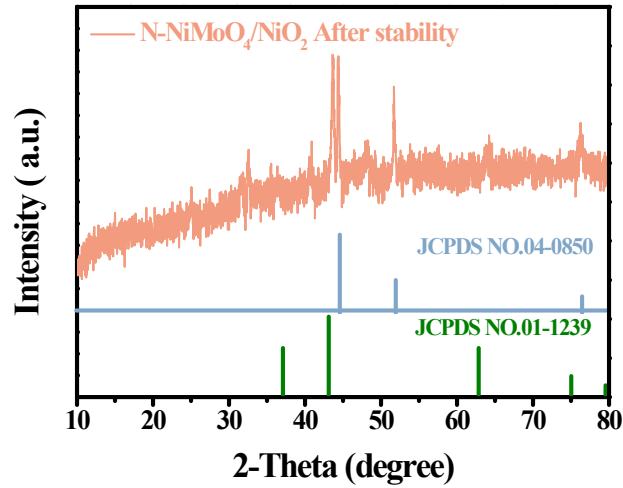

Figure S6 XRD pattern of N-NiMoO<sub>4</sub>/NiO<sub>2</sub> electrocatalyst after OER stability test.

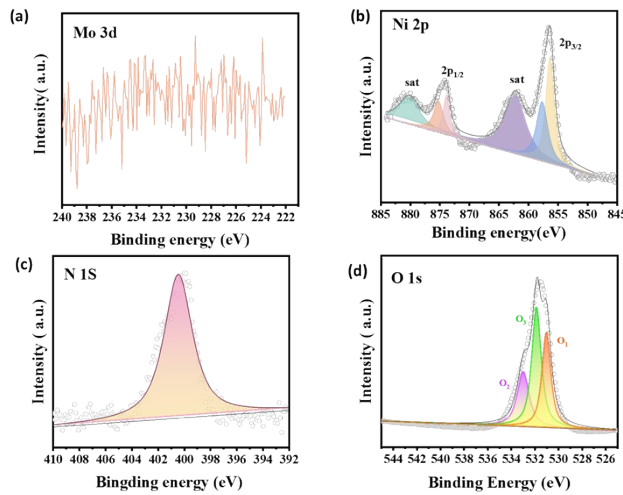

Figure S7 XPS spectra of (a) Mo 3d, (b) Ni 2p, (c) N 1s and (d) O 1s N-NiMoO<sub>4</sub>/NiO<sub>2</sub> electrocatalyst after stability test.

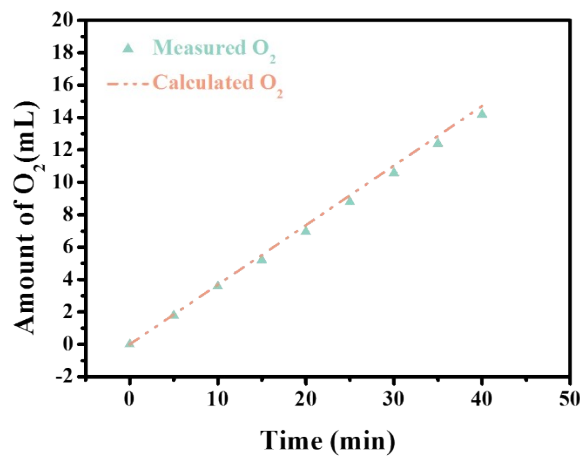

Figure S8 The measured volume and theoretical volume of oxygen gas in OER catalyzed by N-NiMoO<sub>4</sub>/NiO<sub>2</sub> electrocatalyst.

## References

- [1] Y. Song, W. Sha, M. Song, P. Liu, J. Tian, H. Wei, X. Hao, B. Xu, J. Guo and J. Liang, Defect-engineered ultrathin NiMoO<sub>4</sub> nanosheets as efficient and stable electrocatalysts for overall water splitting. *Ceram. Int.*, 2021, **47**, 19098-19105.
- [2] Y. Wang, L. Zhao, X.Sui, D. Gu and Z. Wang, Hierarchical CoP<sub>3</sub>/NiMoO<sub>4</sub> heterostructures on Ni foam as an efficient bifunctional electrocatalyst for overall water splitting. *Ceram. Int.*, 2019, **45**, 17128-17136.
- [3] Z. Wang, H. Wang, S. Ji, X. Wang, P. Zhou, S. Huo, V. Linkov, and R. Wang, A high faraday efficiency NiMoO<sub>4</sub> nanosheet array catalyst by adjusting the hydrophilicity for overall water splitting. *Chem. Eur. J.*, 2020, **26**, 12067-12074.
- [4] S. Zhuang, S.Tong, H. Wang, H. Xiong, Y. Gong, Y. Tang, J. Liu, Y. Chen and P. Wan, The P/NiFe doped NiMoO<sub>4</sub> micro-pillars arrays for highly active and durable hydrogen/oxygen evolution reaction towards overall water splitting. *Int. J. Hydrogen Energy*, 2019, **44**, 24546-24558.
- [5] J. Liang, Y. Wang, C. Wang and S. Lu, In situ formation of NiO on Ni foam prepared with a novel leaven dough method as an outstanding electrocatalyst for oxygen evolution reactions. *J. Mater. Chem A*, 2016, **4**, 9797-9806.
- [6] X. Yin, X. Dai, F. Nie, Z. Ren, Z. Yang, Y. Gan, B. Wu, Y. Cao and X. Zhang, Electronic modulation and proton transfer by iron and borate co-doping for synergistically triggering the oxygen evolution reaction on a hollow NiO bipyramidal prism. *Nanoscale*, 2021, **13**, 14156-14165.
- [7] M. Tahir, L. Pan, R. Zhang, Y. Wang, G. Shen, I. Aslam, M. Qadeer, N. Mahmood, W. Xu, L. Wang, X. Zhang and J. Zou, High-valence-state NiO/Co<sub>3</sub>O<sub>4</sub> nanoparticles on nitrogen-doped carbon for oxygen evolution at low overpotential. *ACS Energy Lett.*, 2017, **2**, 2177-2182.
- [8] X. Zhong, J. Tang, J. Wang, M. Shao, J. Chai, S. Wang, M. Yang, N. Wang, S. Wang, B. Xu and H. Pan, 3D heterostructured pure and N-Doped Ni<sub>3</sub>S<sub>2</sub>/VS<sub>2</sub> nanosheets for high efficient overall water splitting. *Electrochim. Acta*, 2018, **269**, 55-61.
- [9] G.Wei, Z. Xu, X. Zhao, S. Wang, F. Kong and C. An, N-doped CoSe<sub>2</sub> nanosheets as highly-efficient bifunctional electrocatalysts for water splitting. *J. Alloy. Compd.*, 2022, **893**, 162328.
- [10] Q. Kong, N. Fan, S. Chen, X. Wu, L. Liu, R. Lang, Z. Gao, H. Guan, C. Dong and G. Chen, Interface engineering of N-doped Ni<sub>3</sub>S<sub>2</sub>/CoS<sub>2</sub> heterostructures as efficient bifunctional catalysts for overall water splitting. *J. Electroanal. Chem.*, 2021, **895**, 115516.
- [11] L. Pang, A. Barras, Y. Zhang, M. Amin, A. Addad, S. Szunerits and R. Boukherroub, CoO promoted the catalytic activity of nitrogen-doped MoS<sub>2</sub> supported on carbon fibers for overall water splitting. *ACS Appl. Mater.*, 2019, **11**, 31889-31898.
